# Supplementary material for: An evaluation of hospitals’ outpatient service quality from patients’ perspective in Shenzhen: A cross- sectional study
Source: Research Square preprint supplement (doi:10.21203/rs.3.rs-1854670/v1), 2022-07-22
Supplement: Supplementary file 1 [file fce11fcf55f1b1f4565098d7.docx]

**Annex 1 Questionnaire for Outpatient Quality**

| 1. Relationship with the patient: □The patient □ The patient's family □ The patient's friend | | | | | | |
| --- | --- | --- | --- | --- | --- | --- |
| 2.Is this your first visit to this hospital: □Yes □No | | | | | | |
| 3.The last time you visited this hospital was in (month), (year). | | | | | | |
| First-level | No | Code | Second-level | Importance of indicator | Perceived quality of service | Expected quality of service |
| Dimensions |  |  | Indicators | Extremely low⟷ Extremely high | Extremely low⟷ Extremely high | Extremely low⟷ Extremely high |
| Safety | 1 | A1 | Patients could feel relieved and safe in the process of receiving medical services | 1 2 3 4 5 6 7 8 9 | 1 2 3 4 5 6 7 8 9 | 1 2 3 4 5 6 7 8 9 |
| 2 | A2 | The physical environment is safe (such as appropriate brightness of light, measures to prevent falls) | 1 2 3 4 5 6 7 8 9 | 1 2 3 4 5 6 7 8 9 | 1 2 3 4 5 6 7 8 9 |
| 3 | A3 | Take measures to ensure the patient's property and personal safety | 1 2 3 4 5 6 7 8 9 | 1 2 3 4 5 6 7 8 9 | 1 2 3 4 5 6 7 8 9 |
| 4 | A4 | Deal with emergency in time. | 1 2 3 4 5 6 7 8 9 | 1 2 3 4 5 6 7 8 9 | 1 2 3 4 5 6 7 8 9 |
| 5 | A5 | The staff carefully checks the personal information | 1 2 3 4 5 6 7 8 9 | 1 2 3 4 5 6 7 8 9 | 1 2 3 4 5 6 7 8 9 |
| Tangibility | 6 | A6 | Comfortable and convenient environment (such as clean toilets, etc.) | 1 2 3 4 5 6 7 8 9 | 1 2 3 4 5 6 7 8 9 | 1 2 3 4 5 6 7 8 9 |
| 7 | A7 | The sign guidance is clear, and the layout of departments and service windows is reasonable | 1 2 3 4 5 6 7 8 9 | 1 2 3 4 5 6 7 8 9 | 1 2 3 4 5 6 7 8 9 |
| 8 | A8 | The staff shall be professionally dressed and well-groomed | 1 2 3 4 5 6 7 8 9 | 1 2 3 4 5 6 7 8 9 | 1 2 3 4 5 6 7 8 9 |
| 9 | A9 | Posters, brochures, service guides and other material related to medical services are easy to get | 1 2 3 4 5 6 7 8 9 | 1 2 3 4 5 6 7 8 9 | 1 2 3 4 5 6 7 8 9 |
| Reliability | 10 | A10 | Staffs inquire about the illness and history in detail, explain the illness, diagnosis and treatment methods and matters needing attention, and make correct records | 1 2 3 4 5 6 7 8 9 | 1 2 3 4 5 6 7 8 9 | 1 2 3 4 5 6 7 8 9 |
| 11 | A11 | Diagnosis and treatment services for patients on time (such as timely examination and operation arrangement) | 1 2 3 4 5 6 7 8 9 | 1 2 3 4 5 6 7 8 9 | 1 2 3 4 5 6 7 8 9 |
| 12 | A12 | The charged price is transparent, and the closing account is accurate | 1 2 3 4 5 6 7 8 9 | 1 2 3 4 5 6 7 8 9 | 1 2 3 4 5 6 7 8 9 |
| Responsiveness | 13 | A13 | It is convenient for patients to register, wait for treatment, pay fees, get checked, and get medicine | 1 2 3 4 5 6 7 8 9 | 1 2 3 4 5 6 7 8 9 | 1 2 3 4 5 6 7 8 9 |
| 14 | A14 | Patients get timely help from staffs when need | 1 2 3 4 5 6 7 8 9 | 1 2 3 4 5 6 7 8 9 | 1 2 3 4 5 6 7 8 9 |
| 15 | A15 | Patients’ suggestions or complaints are quickly responded to | 1 2 3 4 5 6 7 8 9 | 1 2 3 4 5 6 7 8 9 | 1 2 3 4 5 6 7 8 9 |
| 16 | A16 | Staff wouldn’t shuffle patients in the process of diagnosis and treatment | 1 2 3 4 5 6 7 8 9 | 1 2 3 4 5 6 7 8 9 | 1 2 3 4 5 6 7 8 9 |
| Assurance | 17 | A17 | The staffs have a high level of medical expertise and skills | 1 2 3 4 5 6 7 8 9 | 1 2 3 4 5 6 7 8 9 | 1 2 3 4 5 6 7 8 9 |
| 18 | A18 | Patients consider the medical staff to be honest and trustworthy | 1 2 3 4 5 6 7 8 9 | 1 2 3 4 5 6 7 8 9 | 1 2 3 4 5 6 7 8 9 |
| 19 | A19 | The staffs respect the rights of patients | 1 2 3 4 5 6 7 8 9 | 1 2 3 4 5 6 7 8 9 | 1 2 3 4 5 6 7 8 9 |
| Empathy | 20 | A20 | The staffs can provide personalized services that patients need | 1 2 3 4 5 6 7 8 9 | 1 2 3 4 5 6 7 8 9 | 1 2 3 4 5 6 7 8 9 |
| 21 | A21 | The staffs always hold a rigorous, serious and enthusiastic service attitude in diagnosis and treatment activities | 1 2 3 4 5 6 7 8 9 | 1 2 3 4 5 6 7 8 9 | 1 2 3 4 5 6 7 8 9 |
| 22 | A22 | The hospital can provide follow-up services and rehabilitation guidance for discharged patients | 1 2 3 4 5 6 7 8 9 | 1 2 3 4 5 6 7 8 9 | 1 2 3 4 5 6 7 8 9 |
| 23 | A23 | The hospital provides consultation, outpatient navigation and other convenient services | 1 2 3 4 5 6 7 8 9 | 1 2 3 4 5 6 7 8 9 | 1 2 3 4 5 6 7 8 9 |
| **Overall impressions of outpatient quality: In terms of the quality of healthcare received, what is your overall impression of __ hospital?**  Extremely disagree ⟷ Extremely agree  1 2 3 4 5 6 7 8 9 | | | | | | |
| **Willingness to recommend: If others were to find in the same situation I was in when I went to _ hospital, I would recommend them to receive treatment there."**  Very low⟷ Very high  1 2 3 4 5 | | | | | | |
